# Supplementary figures and images for: Single synapse evaluation of the postsynaptic NMDA receptors targeted by evoked and spontaneous neurotransmission
Source: eLife journal article supplement (doi:10.7554/elife.21170), 2016-11-24

A

Whole cell current clamp:

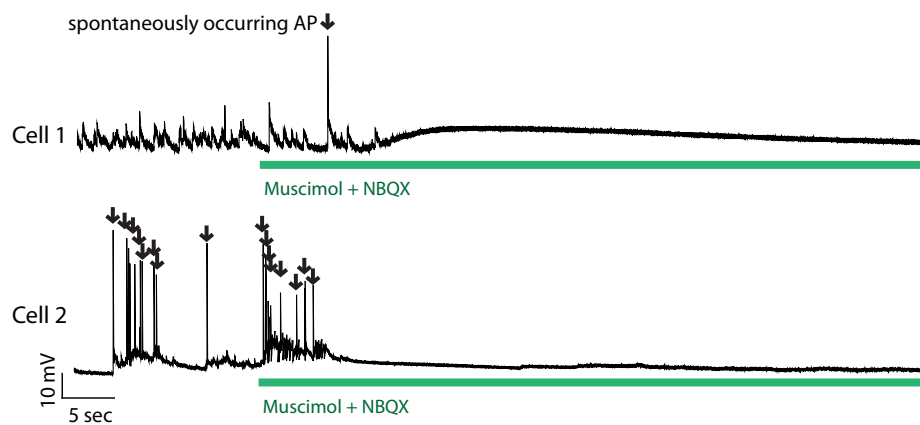

B

Fluo-4 AM Imaging:

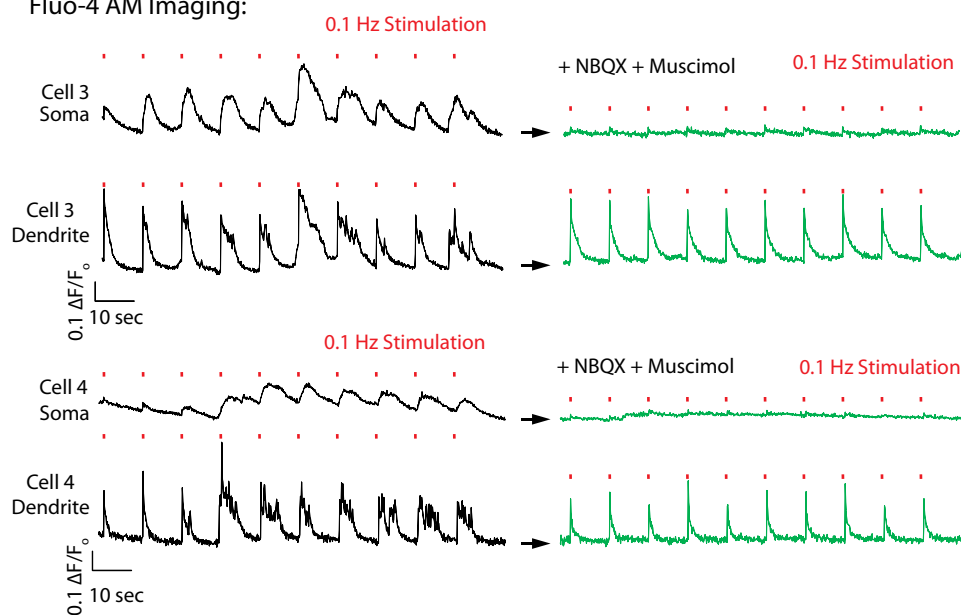

C

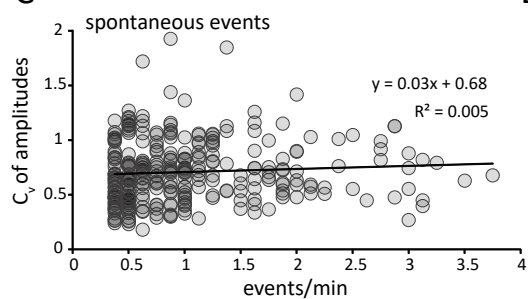

D

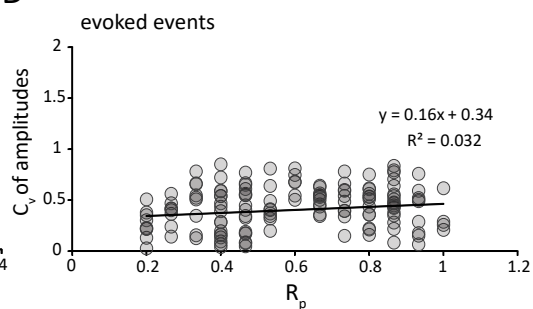

Supplement: supp [file elife-21170-supp-v1.zip]
